# Supplementary material for: Entanglement Characteristic Time from Complex Moduli via i-Rheo GT
Source: MDPI journal article supplement (doi:10.3390/polym14235208), 2022-11-30
Supplement: s1 [file s1]

# Supporting Information

**Entanglement Characteristic Time from Complex Moduli via i-Rheo *GT***

## Entanglement time $\tau_e$ of DPD model from MSD

Figure S1 presents MSD,  $g_1(t)$ , of the middle monomers in a double-logarithmic scale in which  $g_1(t)$  is normalized by  $t^{0.25}$ . We see that  $\frac{g_1(t)}{t^{0.25}}$  for the longest chain shows a plateau-like region, corresponding to the one-dimensional Rouse motion. By fitting the data with straight lines in the different regimes to the scaling laws, namely,  $t < \tau_e$  and  $t > \tau_e$ , the intersecting time is estimated to be about  $\tau_e^* \approx 810$  as indicted in Figure S1. The prefactor  $\beta = \sqrt{2/\pi}$  is introduced to further calculate the model parameters.<sup>6</sup> The resulting  $\tau_e = 9\tau_e^*/\pi \approx 2300$  and  $N_e \approx 28$ . Note that  $N_e$  calculated from MSD is the same with that calculated from the S-coil estimators defined in Z1-code<sup>7-10</sup>. Additionally, for DPD in this work,  $N_e$  is about  $26.8 \pm 2.5$  from the classical S-coil estimator and from the modified S-coil estimator.

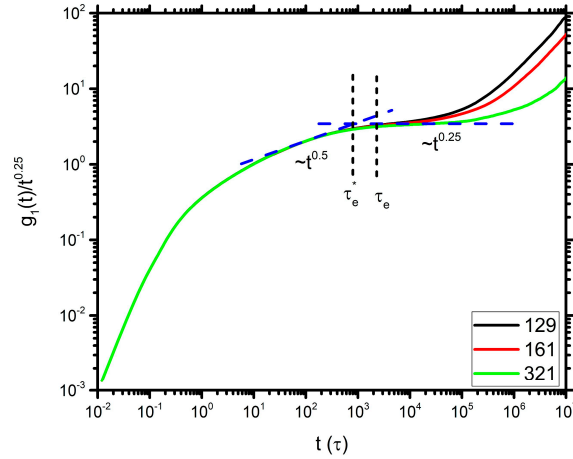

Figure S1. Mean-square displacement of the middle monomers for  $N = 129, 161,$  and  $321$ . The vertical coordinate is normalized by the power law of  $t^{0.25}$ . The intersecting time of the time regimes  $t < \tau_e$  and  $t > \tau_e$  is indicated as  $\tau_e^*$ .

## $\tan \delta$ vs frequency of different chain length for DPD model

$\tan \delta$  for three extra chain length, namely,  $N = 64, 80$ , and  $96$ , is given in Figure S2. At the frequency  $\omega$  around  $0.02$  as presented in the inset of Figure S2,  $\tan \delta$  reaches  $1$  at a slower  $\omega$  for shorter chains definitely indicating a dependence of the entanglement time on the chain length.

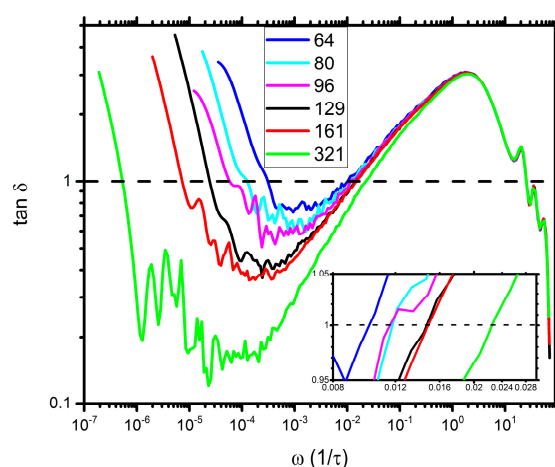

Figure S2.  $\tan \delta$  vs frequency  $\omega$  for the chain length ranging from 64 to 321. The regime of  $\tan \delta$  around 1 is enlarged in the inset.

## References

1. Nikunen, P.; Vattulainen, I.; Karttunen, M., Reptational dynamics in dissipative particle dynamics simulations of polymer melts. *Phys. Rev. E* **2007**, 75 (3), 036713.
2. Mohagheghi, M.; Khomami, B., Molecular Processes Leading to Shear Banding in Well Entangled Polymeric Melts. *ACS Macro Lett.* **2015**, 4 (7), 684-688.

3. Mohagheghi, M.; Khomami, B., Molecularly based criteria for shear banding in transient flow of entangled polymeric fluids. *Phys. Rev. E* **2016**, *93* (6), 062606.
4. Mohagheghi, M.; Khomami, B., Elucidating the flow-microstructure coupling in the entangled polymer melts. Part I: Single chain dynamics in shear flow. *J. Rheol.* **2016**, *60* (5), 849-859.
5. Mohagheghi, M.; Khomami, B., Elucidating the flow-microstructure coupling in entangled polymer melts. Part II: Molecular mechanism of shear banding. *J. Rheol.* **2016**, *60* (5), 861-872.
6. Hou, J.-X., Note: Determine entanglement length through monomer mean-square displacement. *J. Chem. Phys.* **2017**, *146* (2), 026101.
7. Kröger, M., Shortest multiple disconnected path for the analysis of entanglements in two- and three-dimensional polymeric systems. *Comput. Phys. Commun.* **2005**, *168* (3), 209-232.
8. Shanbhag, S.; Kröger, M., Primitive Path Networks Generated by Annealing and Geometrical Methods: Insights into Differences. *Macromolecules* **2007**, *40* (8), 2897-2903.
9. Hoy, R. S.; Foteinopoulou, K.; Kröger, M., Topological analysis of polymeric melts: Chain-length effects and fast-converging estimators for entanglement length. *Phys. Rev. E* **2009**, *80* (3), 031803.
10. Karayiannis, N. C.; Kröger, M., Combined Molecular Algorithms for the Generation, Equilibration and Topological Analysis of Entangled Polymers: Methodology and Performance. *Int. J. Mol. Sci.* **2009**, *10* (11), 5054-5089.
